# Supplementary material for: Social Stimulation by the Owner Increases Dogs’ (Canis familiaris) Social Susceptibility in a Food Choice Task—The Possible Effect of Endogenous Oxytocin Release
Source: MDPI journal article supplement (doi:10.3390/ani12030296), 2022-01-25
Supplement: s1 [file s1]

## Experiment I

**Table S1.** Summary of subjects for the four experimental groups. “Addr.”: addressing demonstration, “N-Addr.”: non-addressing demonstration.

| Pre-treatment:                                  | Stimulating    |                | Ignoring       |                | Statistics                                     | <i>p</i> |
|-------------------------------------------------|----------------|----------------|----------------|----------------|------------------------------------------------|----------|
| Demonstration context:                          | Addr.          | N-Addr.        | Addr.          | N-Addr.        |                                                |          |
| Nr. of subjects                                 | 19             | 22             | 17             | 24             | -                                              | -        |
| Age in months (mean $\pm$ SE)                   | 47.9 $\pm$ 6.9 | 56.8 $\pm$ 8.8 | 42.6 $\pm$ 6.8 | 47.8 $\pm$ 7.9 | ANOVA<br>$F_{(3,81)} = 0.55$                   | 0.65     |
| Nr. of males & females                          | 12 & 7         | 12 & 10        | 7 & 10         | 13 & 11        | chi <sup>2</sup> test<br>$\chi^2_{(3)} = 1.76$ | 0.62     |
| Dogs with training certificate & untrained dogs | 13 & 6         | 16 & 6         | 12 & 5         | 16 & 8         | chi <sup>2</sup> test<br>$\chi^2_{(3)} = 0.22$ | 0.97     |

## Experiment II

**Table S2.** Summary of subjects for the two experimental groups.

| Pre-treatment:                                                        | Oxytocin        | Placebo         | Statistics                          | <i>p</i> |
|-----------------------------------------------------------------------|-----------------|-----------------|-------------------------------------|----------|
| Nr. of subjects                                                       | 15              | 17              | -                                   | -        |
| Age in months (mean $\pm$ SE)                                         | 56.8 $\pm$ 4.9  | 53.1 $\pm$ 10.7 | indep. t-test<br>$t_{(30)} = 0.295$ | 0.77     |
| Nr. of males & females                                                | 8 & 7           | 10 & 7          | Fisher’s exact test                 | 1.00     |
| Dogs with training certificate & untrained dogs                       | 12 & 3          | 11 & 6          | Fisher’s exact test                 | 0.44     |
| Time elapsed between Exp. I & II<br>(in months, mean $\pm$ SE)        | 6.22 $\pm$ 0.74 | 7.07 $\pm$ 0.58 | indep. t-test<br>$t_{(30)} = 0.886$ | 0.38     |
| Nr. of subjects that received Stim. & Ign. pre-treatment in<br>Exp. I | 6 & 9           | 8 & 9           | Fisher’s exact test                 | 0.73     |
| Change-in-bias score (mean $\pm$ SE) in Exp. I                        | 1.47 $\pm$ 0.3  | 1.41 $\pm$ 0.56 | indep. t-test<br>$t_{(30)} = 0.083$ | 0.94     |
